# Supplementary material
Source: publisher site journal article supplement (https://cdn.jamanetwork.com/ama/content_public/journal/jama/938494/joi200055supp2_prod.pdf)
Supplement: Supplementary file 1 [file joi200055supp2_prod.pdf]

## Supplementary Online Content

Rosenberg ES, et al. Association of treatment with hydroxychloroquine or azithromycin with in-hospital mortality in patients with COVID-19 in New York State. *JAMA*.  
doi:10.1001/jama.2020.8630

**eTable 1.** Medication Prescription Patterns

**eTable 2.** Other Medications Received by Patients Receiving Neither Hydroxychloroquine nor Azithromycin

**eTable 3.** Associations Between In-Hospital Death and Patient Characteristics

**eTable 4.** Associations Between Cardiac Arrest and Patient Characteristics

**eTable 5.** Associations Between Abnormal ECG (Prolonged QT or Arrhythmia) and Patient Characteristics

**eTable 6.** Alternative Model Results for In-Hospital Death

**eTable 7.** Model-Adjusted Risk of In-Hospital Death, Cardiac Arrest, Arrhythmia – Models Stratified by Receipt of Mechanical Ventilation

This supplementary material has been provided by the authors to give readers additional information about their work.

**eTable 1. Medication Prescription Patterns**

|                                       | No./total No. (%)                 |                     |                    |
|---------------------------------------|-----------------------------------|---------------------|--------------------|
|                                       | Initial prescription <sup>a</sup> | Second prescription | Third prescription |
| <b>Hydroxychloroquine<sup>b</sup></b> |                                   |                     |                    |
| <b>Dose</b>                           |                                   |                     |                    |
| 200mg                                 | 46/1,006 (4.6)                    | 483/679 (71.1)      | 20/36 (55.6)       |
| 400mg                                 | 908/1,006 (90.3)                  | 191/679 (28.1)      | 15/36 (41.7)       |
| 600mg                                 | 28/1,006 (2.8)                    | 1/679 (0.2)         | 1/36 (2.8)         |
| Other                                 | 15/1,006 (1.5)                    | 3/679 (0.4)         | 0/36 (0.0)         |
| Unknown                               | 9/1,006 (0.9)                     | 1/679 (0.2)         | 0/36 (0.0)         |
| <b>Frequency</b>                      |                                   |                     |                    |
| Once a day                            | 247/1,006 (24.6)                  | 167/680 (24.6)      | 9/36 (25.0)        |
| Twice a day                           | 708/1,006 (70.4)                  | 497/680 (73.1)      | 26/36 (72.2)       |
| Other                                 | 22/1,006 (2.2)                    | 7/680 (1.0)         | 1/36 (2.8)         |
| Unknown                               | 29/1,006 (2.9)                    | 9/680 (1.3)         | 0/36 (0.0)         |
|                                       |                                   |                     |                    |
| <b>Azithromycin</b>                   |                                   |                     |                    |
| <b>Dose</b>                           |                                   |                     |                    |
| 200mg                                 | 5/946 (0.5)                       | 1/385 (0.3)         | 0/51 (0.0)         |
| 250mg                                 | 53/946 (5.6)                      | 135/385 (35.1)      | 23/51 (45.1)       |
| 400mg                                 | 4/946 (0.4)                       | 0/385 (0.0)         | 0/51 (0.0)         |
| 500mg                                 | 870/946 (92.0)                    | 248/385 (64.4)      | 28/51 (54.9)       |
| Other                                 | 2/946 (0.2)                       | 1/385 (0.3)         | 0/51 (0.0)         |
| Unknown                               | 12/946 (1.3)                      | 0/385 (0.0)         | 0/51 (0.0)         |
| <b>Methods</b>                        |                                   |                     |                    |
| Oral                                  | 454/946 (48.0)                    | 308/386 (79.8)      | 44/51 (86.3)       |
| IV                                    | 482/946 (50.9)                    | 77/386 (20.0)       | 7/51 (13.7)        |
| Unknown                               | 10/946 (1.1)                      | 1/386 (0.3)         | 0/51 (0.0)         |
| <b>Frequency</b>                      |                                   |                     |                    |
| Only once                             | 145/946 (15.3)                    | 11/385 (2.9)        | 0/51 (0.0)         |
| Once a day                            | 713/946 (75.4)                    | 340/385 (88.3)      | 42/51 (82.4)       |
| Twice a day                           | 24/946 (2.5)                      | 6/385 (1.6)         | 1/51 (2.0)         |
| Other                                 | 38/946 (4.0)                      | 20/385 (5.2)        | 8/51 (15.7)        |
| Unknown                               | 26/946 (2.8)                      | 8/385 (2.1)         | 0/51 (0.0)         |

- Data represent the first 3 recorded prescriptions for each medication within each medical record, among patients receiving hydroxychloroquine and/or azithromycin
- Hydroxychloroquine is available only as an oral formulation. Oral method of administration was thus indicated for 98% (1,693/1,721) of prescriptions, with the remainder coded 'unknown' by abstractors.

**eTable 2. Other Medications Received by Patients Receiving Neither Hydroxychloroquine nor Azithromycin**

|                                             | <b>N=221<sup>a</sup></b> |            |
|---------------------------------------------|--------------------------|------------|
| <b>Medication</b>                           | <b>n/N</b>               | <b>(%)</b> |
| <b>Antibiotics</b>                          |                          |            |
| Clarithromycin                              | 0/193                    | (0.0%)     |
| Erythromycin                                | 0/193                    | (0.0%)     |
| <b>Angiotensin Receptor Blockers</b>        |                          |            |
| Losartan                                    | 5/192                    | (2.6%)     |
| Valsartan                                   | 1/193                    | (0.5%)     |
| Azilsartan                                  | 0/193                    | (0.0%)     |
| Candesartan                                 | 0/193                    | (0.0%)     |
| Eprosartan                                  | 0/193                    | (0.0%)     |
| Irbesartan                                  | 0/193                    | (0.0%)     |
| Olmesartan                                  | 0/193                    | (0.0%)     |
| Telmisartan                                 | 0/193                    | (0.0%)     |
| <b>ACE Inhibitors</b>                       |                          |            |
| Lisinopril                                  | 13/193                   | (6.7%)     |
| Benazepril                                  | 1/193                    | (0.5%)     |
| Enalapril/Enalaprilat                       | 1/193                    | (0.5%)     |
| Quinapril                                   | 1/193                    | (0.5%)     |
| Captopril                                   | 0/193                    | (0.0%)     |
| Fosinopril                                  | 0/193                    | (0.0%)     |
| Moexipril                                   | 0/193                    | (0.0%)     |
| Perindopril                                 | 0/193                    | (0.0%)     |
| Ramipril                                    | 0/193                    | (0.0%)     |
| Trandolapril                                | 0/193                    | (0.0%)     |
| <b>Nonsteroidal anti-inflammatory drugs</b> |                          |            |
| Aspirin                                     | 38/192                   | (19.8%)    |
| Ibuprofen                                   | 6/193                    | (3.1%)     |
| Naproxen                                    | 1/193                    | (0.5%)     |
| Celecoxib                                   | 0/193                    | (0.0%)     |
| Diclofenac                                  | 0/193                    | (0.0%)     |
| Indomethacin                                | 0/193                    | (0.0%)     |
| Oxaprozin                                   | 0/193                    | (0.0%)     |
| Piroxicam                                   | 0/193                    | (0.0%)     |

- a. Medications available for abstraction among the 193 of 221 patients receiving neither drug who were discharged or died and had available records. ACE=angiotensin-converting enzyme

**eTable 3. Associations Between In-Hospital Death and Patient Characteristics**

| <b>Demographic Characteristics</b>                             | <b>No./total No. (%)</b> | <b>RR (95% CIs)</b> | <b>p-value</b> |
|----------------------------------------------------------------|--------------------------|---------------------|----------------|
| Male                                                           | 183/858 (21.3)           | 1.13 (0.92, 1.40)   | .24            |
| Female                                                         | 109/580 (18.8)           | ---                 |                |
| Race                                                           |                          |                     | .03            |
| White                                                          | 65/322 (20.2)            | ---                 |                |
| Black                                                          | 89/371 (24.0)            | 1.19 (0.90, 1.58)   |                |
| Hispanic                                                       | 69/431 (16.0)            | 0.79 (0.59, 1.08)   |                |
| Not listed above <sup>a</sup>                                  | 56/243 (23.1)            | 1.15 (0.83, 1.57)   |                |
| Age                                                            |                          |                     | < .001         |
| Under 18 years                                                 | 2/25 (8.0)               | 0.19 (0.06, 0.56)   |                |
| 18-30 years old                                                | 3/53 (5.7)               | 0.18 (0.10, 0.33)   |                |
| 31-44 years old                                                | 11/197 (5.6)             | 0.49 (0.38, 0.62)   |                |
| 45-64 years old                                                | 75/504 (14.9)            | 0.26 (0.07, 0.99)   |                |
| 65 and older                                                   | 201/660 (30.5)           | ----                |                |
| <b>Preexisting conditions</b>                                  |                          |                     |                |
| Smoking                                                        |                          |                     | .03            |
| Current                                                        | 10/45 (22.2)             | 1.30 (0.74, 2.29)   |                |
| Former                                                         | 52/206 (25.2)            | 1.47 (1.11, 1.95)   |                |
| Never                                                          | 141/823 (17.1)           | ----                |                |
| Obesity (BMI $\geq$ 30)                                        |                          |                     | .74            |
| Yes                                                            | 88/438 (20.1)            | 0.96 (0.75, 1.22)   |                |
| No                                                             | 124/592 (21.0)           | ----                |                |
| Cancer                                                         |                          |                     |                |
| Yes                                                            | 18/55 (32.7)             | 1.65 (1.11, 2.45)   | .01            |
| No                                                             | 274/1,383 (19.8)         | ----                |                |
| Any renal disease                                              |                          |                     |                |
| Yes                                                            | 60/187 (32.1)            | 1.73 (1.36, 2.20)   | < .001         |
| No                                                             | 232/1,251 (18.6)         | ----                |                |
| Any chronic lung conditions                                    |                          |                     |                |
| Yes                                                            | 59/259 (22.8)            | 1.15 (0.90, 1.48)   | .27            |
| No                                                             | 233/1,179 (19.8)         | ----                |                |
| Diabetes                                                       |                          |                     |                |
| Yes                                                            | 134/504 (26.6)           | 1.57 (1.28, 1.93)   | < .001         |
| No                                                             | 158/934 (16.9)           | ----                |                |
| Any cardiovascular disease                                     |                          |                     |                |
| Yes                                                            | 136/438 (31.1)           | 1.99 (1.63, 2.43)   | < .001         |
| No                                                             | 156/1,000 (15.6)         | ----                |                |
| Hypertension                                                   |                          |                     |                |
| Yes                                                            | 210/816 (25.7)           | 1.95 (1.55, 2.46)   | < .001         |
| No                                                             | 82/622 (13.2)            | ----                |                |
| Coronary artery disease                                        |                          |                     |                |
| Yes                                                            | 56/173 (32.4)            | 1.74 (1.36, 2.22)   | < .001         |
| No                                                             | 18.7 (236/1,265)         | ----                |                |
| Congestive heart failure                                       |                          |                     |                |
| Yes                                                            | 30/96 (31.3)             | 1.60 (1.17, 2.20)   | .004           |
| No                                                             | 262/1,342 (19.5)         | ----                |                |
| Dementia                                                       |                          |                     |                |
| Yes                                                            | 39/93 (41.9)             | 2.23 (1.70, 2.90)   | < .001         |
| No                                                             | 253/1,345 (18.8)         | ----                |                |
| <b>Clinical severity features within 24 hours of admission</b> |                          |                     |                |
| Abnormal chest imaging <sup>b</sup>                            |                          |                     |                |
| Yes                                                            | 12/205 (5.9)             | 3.88 (2.22, 6.78)   | < .001         |
| No                                                             | 280/1,233 (22.7)         | ----                |                |

|                                                  | No./total No. (%) | RR (95% CIs)      | p-value |
|--------------------------------------------------|-------------------|-------------------|---------|
| Respiratory rate > 22                            |                   |                   |         |
| Yes                                              | 98/283 (34.6)     | 1.99 (1.62, 2.45) | < .001  |
| No                                               | 186/1,071 (17.3)  | ----              |         |
| Systolic BP < 90 mm Hg or diastolic BP < 60 mmHg |                   |                   |         |
| Yes                                              | 44/151 (29.1)     | 1.48 (1.13, 1.94) | .005    |
| No                                               | 237/1,203 (19.7)  | ----              |         |
| O <sub>2</sub> Saturation                        |                   |                   |         |
| < 90%                                            | 92/214 (43.0)     | 2.73 (2.20, 3.39) | < .001  |
| 90-93%                                           | 49/250 (19.6)     | 1.24 (0.93, 1.67) | .14     |
| <93%                                             | 142/901 (15.8)    | ----              |         |
| Fever (Temperature > 38.0 C)                     |                   |                   |         |
| Yes                                              | 98/481 (20.4)     | 0.97 (0.78, 1.21) | .79     |
| No                                               | 184/877 (21.0)    | ----              |         |
| Elevated creatinine <sup>c</sup>                 |                   |                   |         |
| Yes                                              | 148/395 (37.5)    | 2.67 (2.19, 3.26) | < .001  |
| No                                               | 141/1,004 (14.0)  | ----              |         |
| AST > 40                                         |                   |                   |         |
| Yes                                              | 173/667 (25.9)    | 1.75 (1.40, 2.20) | < .001  |
| No                                               | 94/638 (14.8)     | ----              |         |
| ALT > 40                                         |                   |                   |         |
| Yes                                              | 86/423 (20.3)     | 0.96 (0.77, 1.21) | .75     |
| No                                               | 186/882 (21.0)    | ----              |         |

AZM = azithromycin; BMI = body mass index; BP = blood pressure; AST = aspartate aminotransferase; ALT = alanine aminotransferase

<sup>a</sup> Not listed above included Asian/Pacific islanders, American Indian or Alaska Native, Multiracial, and Not Specified.

<sup>b</sup> Abnormal chest imaging was defined as having abnormal x-ray, MRI, and/or CT scan results at any point during hospitalization.

<sup>c</sup> Elevated creatine: >1.2 mg/dL for females, >1.4 mg/dL for males

**eTable 4. Associations Between Cardiac Arrest and Patient Characteristics**

|                                                                | No./total No. (%) | RR (95% CIs)       | p-value |
|----------------------------------------------------------------|-------------------|--------------------|---------|
| <b>Demographic Characteristics</b>                             |                   |                    |         |
| Male                                                           | 112/858 (13.1)    | 1.13 (0.85, 1.50)  | .40     |
| Female                                                         | 67/580 (11.6)     | ---                |         |
| Race                                                           |                   |                    | .25     |
| White                                                          | 41/322 (12.7)     | ---                |         |
| Black                                                          | 53/371 (14.3)     | 1.12 (0.77, 1.64)  |         |
| Hispanic                                                       | 43/430 (10.0)     | 0.80 (0.59, 1.08)  |         |
| Not listed above <sup>a</sup>                                  | 34/243 (14.0)     | 1.10 (0.72, 1.68)  |         |
| Age                                                            |                   |                    | < .001  |
| Under 18 years                                                 | 1/25 (4.0)        | 0.22 (0.03, 1.52)  |         |
| 18-30 years old                                                | 1/53 (1.9)        | 0.10 (0.01, 0.73)  |         |
| 31-44 years old                                                | 8/197 (4.1)       | 0.22 (0.11, 0.45)  |         |
| 45-64 years old                                                | 50/504 (9.9)      | 0.55 (0.40, 0.75)  |         |
| 65 and older                                                   | 119/659 (18.1)    | ----               |         |
| <b>Preexisting conditions</b>                                  |                   |                    |         |
| Smoking                                                        |                   |                    | .34     |
| Current                                                        | 6/45 (13.3)       | 1.18 (0.55, 2.55)  |         |
| Former                                                         | 31/206 (15.1)     | 1.33 (0.92, 1.94)  |         |
| Never                                                          | 93/823 (11.3)     |                    |         |
| Obesity (BMI $\geq$ 30)                                        |                   |                    |         |
| Yes                                                            | 67/438 (15.3)     | 1.35 (0.98, 1.85)  | .06     |
| No                                                             | 67/592 (11.3)     | ----               |         |
| Cancer                                                         |                   |                    |         |
| Yes                                                            | 11/55 (20.0)      | 1.65 (0.95, 2.85)  | .07     |
| No                                                             | 168/1,383 (12.2)  | ----               |         |
| Any renal disease                                              |                   |                    |         |
| Yes                                                            | 38/187 (20.3)     | 1.80 (1.30, 2.49)  | < .001  |
| No                                                             | 141/1,251 (11.3)  | ----               |         |
| Any chronic lung conditions                                    |                   |                    |         |
| Yes                                                            | 33/259 (12.7)     | 1.03 (0.72, 1.46)  | .87     |
| No                                                             | 146/1,179 (12.4)  | ----               |         |
| Diabetes                                                       |                   |                    |         |
| Yes                                                            | 91/504 (18.1)     | 1.92 (1.46, 2.52)  | < .001  |
| No                                                             | 88/934 (9.4)      | ----               |         |
| Any cardiovascular conditions                                  |                   |                    |         |
| Yes                                                            | 83/438 (19.0)     | 1.97 (1.50, 2.59)  | < .001  |
| No                                                             | 96/1,000 (9.6)    | ----               |         |
| Hypertension                                                   |                   |                    |         |
| Yes                                                            | 129/816 (15.8)    | 1.97 (1.44, 2.68)  | < .001  |
| No                                                             | 50/622 (8.0)      | ----               |         |
| Coronary artery disease                                        |                   |                    |         |
| Yes                                                            | 32/173 (18.5)     | 1.59 (1.12, 2.25)  | .009    |
| No                                                             | 147/1,265 (11.6)  | ----               |         |
| Congestive heart failure                                       |                   |                    |         |
| Yes                                                            | 18/96 (18.8)      | 1.56 (1.01, 2.43)  | .04     |
| No                                                             | 161/1,342 (12.0)  | ----               |         |
| Dementia                                                       |                   |                    |         |
| Yes                                                            | 25/93 (26.9)      | 2.35 (1.63, 3.39)  | < .001  |
| No                                                             | 154/1,345 (11.5)  | ----               |         |
| <b>Clinical severity features within 24 hours of admission</b> |                   |                    |         |
| Abnormal chest imaging <sup>b</sup>                            |                   |                    |         |
| Yes                                                            | 173/1,233 (14.0)  | 4.80 (2.15, 10.67) | < .001  |
| No                                                             | 6/205 (2.9)       | ----               |         |

|                                                  | No./total No. (%) | RR (95% CIs)      | p-value |
|--------------------------------------------------|-------------------|-------------------|---------|
| Respiratory rate > 22                            |                   |                   |         |
| Yes                                              | 63/283 (22.3)     | 2.15 (1.62, 2.84) | < .001  |
| No                                               | 111/1,071 (10.4)  | ----              |         |
| Systolic BP < 90 mm Hg or diastolic BP < 60 mmHg |                   |                   |         |
| Yes                                              | 32/151 (21.2)     | 1.82 (1.29, 2.57) | < .001  |
| No                                               | 140/1,203 (11.6)  | ----              |         |
| O <sub>2</sub> Saturation                        |                   |                   |         |
| < 90%                                            | 51/214 (23.8)     | 2.50 (1.83, 3.41) | < .001  |
| 90-93%                                           | 38/250 (15.2)     | 1.59 (1.12, 2.27) | .01     |
| >93%                                             | 86/901 (9.5)      | ----              |         |
| Fever (Temperature > 38.0 C)                     |                   |                   |         |
| Yes                                              | 65/481 (13.5)     | 1.09 (0.82, 1.45) | .57     |
| No                                               | 109/877 (12.4)    | ----              |         |
| Elevated creatinine <sup>c</sup>                 |                   |                   |         |
| Yes                                              | 91/395 (23.0)     | 2.69 (2.05, 3.53) | < .001  |
| No                                               | 86/1,004 (8.6)    | ----              |         |
| AST > 40                                         |                   |                   |         |
| Yes                                              | 99/667 (14.8)     | 1.55 (1.15, 2.09) | .004    |
| No                                               | 61/636 (9.6)      | ----              |         |
| ALT > 40                                         |                   |                   |         |
| Yes                                              | 41/423 (9.7)      | 0.69 (0.49, 0.96) | .03     |
| No                                               | 124/882 (14.1)    | ----              |         |

AZM = azithromycin; BMI = body mass index; BP = blood pressure; AST = aspartate aminotransferase; ALT = alanine aminotransferase

<sup>a</sup> Not listed above included Asian/Pacific islanders, American Indian or Alaska Native, Multiracial, and Not Specified.

<sup>b</sup> Abnormal chest imaging was defined as having abnormal x-ray, MRI, and/or CT scan results at any point during hospitalization.

<sup>c</sup> Elevated creatinine: >1.2 mg/dL for females, >1.4 mg/dL for males

**eTable 5. Associations Between Abnormal ECG (Prolonged QT or Arrhythmia) and Patient Characteristics**

|                                                                | No./total No. (%) | RR (95% CIs)      | p-value |
|----------------------------------------------------------------|-------------------|-------------------|---------|
| <b>Demographic Characteristics</b>                             |                   |                   |         |
| Male                                                           | 217/858 (25.3)    | 1.21 (0.99, 1.47) | .05     |
| Female                                                         | 121/580 (20.9)    | ----              |         |
| Race                                                           |                   |                   | .95     |
| White                                                          | 77/322 (23.9)     | ----              |         |
| Black                                                          | 89/371 (24.0)     | 1.00 (0.77, 1.31) |         |
| Hispanic                                                       | 106/430 (24.7)    | 1.03 (0.80, 1.33) |         |
| Not listed above <sup>a</sup>                                  | 55/243 (22.6)     | 0.95 (0.70, 1.28) |         |
| Age                                                            |                   |                   | < .001  |
| Under 18 years                                                 | 0/25 (0.0)        | 0.00 (0.00, 0.00) |         |
| 18-30 years old                                                | 6/53 (11.3)       | 0.39 (0.18, 0.84) |         |
| 31-44 years old                                                | 30/197 (15.2)     | 0.53 (0.37, 0.75) |         |
| 45-64 years old                                                | 112/504 (22.2)    | 0.77 (0.63, 0.94) |         |
| 65 and older                                                   | 190/659 (28.8)    | ----              |         |
| <b>Preexisting conditions</b>                                  |                   |                   |         |
| Smoking                                                        |                   |                   | .009    |
| Current                                                        | 16/45 (35.6)      | 1.71 (1.13, 2.59) |         |
| Former                                                         | 59/206 (28.6)     | 1.38 (1.07, 1.78) |         |
| Never                                                          | 171/823 (20.8)    | ----              |         |
| Obesity (BMI $\geq$ 30)                                        |                   |                   |         |
| Yes                                                            | 113/438 (25.8)    | 1.09 (0.88, 1.35) | .43     |
| No                                                             | 140/592 (23.7)    | ----              |         |
| Cancer                                                         |                   |                   |         |
| Yes                                                            | 20/55 (36.4)      | 1.58 (1.10, 2.27) | .01     |
| No                                                             | 318/1,383 (23.0)  | ----              |         |
| Any renal disease                                              |                   |                   |         |
| Yes                                                            | 66/187 (35.3)     | 1.62 (1.30, 2.02) | < .001  |
| No                                                             | 272/1,251 (21.7)  | ----              |         |
| Any chronic lung conditions                                    |                   |                   |         |
| Yes                                                            | 73/259 (28.2)     | 1.25 (1.00, 1.56) | .04     |
| No                                                             | 265/1,179 (22.5)  | ----              |         |
| Diabetes                                                       |                   |                   |         |
| Yes                                                            | 149/504 (29.6)    | 1.46 (1.21, 1.76) | < .001  |
| No                                                             | 189/934 (20.2)    | ----              |         |
| Any cardiovascular conditions                                  |                   |                   |         |
| Yes                                                            | 156/438 (35.6)    | 1.96 (1.63, 2.35) | < .001  |
| No                                                             | 182/1,000 (18.2)  | ----              |         |
| Hypertension                                                   |                   |                   |         |
| Yes                                                            | 217/816 (26.6)    | 1.37 (1.12, 1.66) | .002    |
| No                                                             | 121/622 (19.5)    | ----              |         |
| Coronary artery disease                                        |                   |                   |         |
| Yes                                                            | 66/173 (38.2)     | 1.77 (1.43, 2.20) | < .001  |
| No                                                             | 272/1,265 (21.5)  | ----              |         |
| Congestive heart failure                                       |                   |                   |         |
| Yes                                                            | 39/96 (40.6)      | 1.82 (1.40, 2.37) | < .001  |
| No                                                             | 299/1,342 (22.3)  | ----              |         |
| Dementia                                                       |                   |                   |         |
| Yes                                                            | 24/93 (25.8)      | 1.11 (0.77, 1.58) | .58     |
| No                                                             | 314/1,345 (23.4)  | ----              |         |
| <b>Clinical severity features within 24 hours of admission</b> |                   |                   |         |
| Abnormal chest imaging <sup>b</sup>                            |                   |                   |         |
| Yes                                                            | 309/1,233 (25.1)  | 1.77 (1.25, 2.52) | .001    |
| No                                                             | 29/205 (14.2)     | ----              |         |



|                                                  | No./total No. (%) | RR (95% CIs)      | p-value |
|--------------------------------------------------|-------------------|-------------------|---------|
| Respiratory rate > 22                            |                   |                   |         |
| Yes                                              | 101/283 (35.7)    | 1.71 (1.41, 2.08) | < .001  |
| No                                               | 223/1,071 (20.8)  | ----              |         |
| Systolic BP < 90 mm Hg or diastolic BP < 60 mmHg |                   |                   |         |
| Yes                                              | 50/151 (33.1)     | 1.46 (1.14, 1.87) | .003    |
| No                                               | 273/1,203 (22.7)  | ----              |         |
| O <sub>2</sub> Saturation                        |                   |                   |         |
| < 90%                                            | 78/214 (36.5)     | 1.77 (1.42, 2.20) | < .001  |
| 90-93%                                           | 61/250 (24.4)     | 1.18 (0.92, 1.52) | .20     |
| >93%                                             | 186/901 (20.6)    | ----              |         |
| Fever (Temperature > 38.0 C)                     |                   |                   |         |
| Yes                                              | 112/481 (23.3)    | 0.97 (0.79, 1.18) | .75     |
| No                                               | 211/877 (24.1)    | ----              |         |
| Elevated creatinine <sup>c</sup>                 |                   |                   |         |
| Yes                                              | 132/395 (33.4)    | 1.65 (1.37, 1.99) | < .001  |
| No                                               | 203/1,004 (20.2)  | ----              |         |
| AST > 40                                         |                   |                   |         |
| Yes                                              | 178/667 (26.7)    | 1.29 (1.06, 1.57) | .01     |
| No                                               | 132/636 (20.8)    | ----              |         |
| ALT > 40                                         |                   |                   |         |
| Yes                                              | 100/423 (23.6)    | 0.97 (0.79, 1.20) | .81     |
| No                                               | 214/882 (24.3)    | ----              |         |

AZM = azithromycin; BMI = body mass index; BP = blood pressure; AST = aspartate aminotransferase; ALT = alanine aminotransferase

<sup>a</sup> Not listed above included Asian/Pacific islanders, American Indian or Alaska Native, Multiracial, and Not Specified.

<sup>b</sup> Abnormal chest imaging was defined as having an abnormal x-ray, MRI, and/or CT scan result at any point during hospitalization.

<sup>c</sup> Elevated creatinine: >1.2 mg/dL for females, >1.4 mg/dL for males

**eTable 6. Alternative Model Results for In-Hospital Death**

|                                                                    | Hydroxychloroquine + azithromycin vs. neither | Hydroxychloroquine alone vs. neither | Azithromycin alone vs. neither | Hydroxychloroquine alone vs. Azithromycin alone |
|--------------------------------------------------------------------|-----------------------------------------------|--------------------------------------|--------------------------------|-------------------------------------------------|
| Model type                                                         | Estimate (95% CI)                             | Estimate (95% CI)                    | Estimate (95% CI)              | Estimate (95% CI)                               |
| Same as primary model, but hazard function stratified on facility. | 1.32 (0.81, 2.18)                             | 1.10 (0.65, 1.87)                    | 0.65 (0.34, 1.23)              | 1.79 (0.93, 3.09)                               |
| Same as primary model, but with random effect for on facility.     | 1.33 (0.83, 2.15)                             | 1.08 (0.63, 1.85)                    | 0.58 (0.29, 1.13)              | 1.87 (1.02, 3.44)                               |
| Same as primary model, but with time-dependent treatment status    | 1.83 (1.02, 3.28)                             | 1.46 (0.84, 2.55)                    | 0.73 (0.33, 1.63)              | 1.99 (1.02 3.87)                                |

**eTable 7. Model-Adjusted Risk of In-Hospital Death, Cardiac Arrest, Arrhythmia – Models Stratified by Receipt of Mechanical Ventilation**

| Outcome                                | Model type <sup>a</sup>  | Hydroxychloroquine + azithromycin vs. neither |                   | Hydroxychloroquine - azithromycin vs. neither | Azithromycin vs. neither | Hydroxychloroquine alone vs. Azithromycin alone |
|----------------------------------------|--------------------------|-----------------------------------------------|-------------------|-----------------------------------------------|--------------------------|-------------------------------------------------|
|                                        |                          |                                               | Est. (95% CI)     | Est. (95% CI)                                 | Est. (95% CI)            | Est. (95% CI)                                   |
| In-hospital death (Hazard Ratio)       | Cox proportional hazards | Mech vent.                                    | 0.60 (0.21, 1.72) | 0.53 (0.17, 1.69)                             | 0.52 (0.10, 2.84)        | 1.01 (0.30, 3.44)                               |
|                                        |                          | No mech vent.                                 | 1.19 (0.50, 2.83) | 1.32 (0.61, 2.83)                             | 0.74 (0.32, 1.72)        | 1.78 (0.95, 3.35)                               |
| Cardiac arrest (Odds Ratio)            | GEE logistic regression  | Mech vent.                                    | 0.92 (0.19, 4.38) | 0.78 (0.14, 4.36)                             | 1.02 (0.13, 8.24)        | 0.76 (0.20, 2.88)                               |
|                                        |                          | No mech vent.                                 | 2.24 (0.86, 5.82) | 2.63 (0.83, 8.31)                             | 0.87 (0.30, 2.50)        | 3.01 (1.07, 8.51)                               |
| Abnormal ECG <sup>b</sup> (Odds Ratio) | GEE logistic regression  | Mech vent.                                    | 0.93 (0.35, 2.46) | 0.51 (0.20, 1.32)                             | 1.33 (0.27, 6.65)        | 0.39 (0.07, 2.04)                               |
|                                        |                          | No mech vent.                                 | 1.33 (0.72, 2.49) | 1.73 (0.94, 3.21)                             | 0.97 (0.41, 2.25)        | 1.80 (0.82, 3.93)                               |

- a. Models adjusted for sex, age category (below 65 years old vs. 65 and older), diabetes, any cardiovascular disease, abnormal chest imaging based on X-ray/MRI/CT scan, respiration rate > 22, O<sub>2</sub> saturation <90% elevated creatinine, and AST > 40 as fixed effects and repeated measures for hospital.
- b. Abnormal ECG included prolonged QT and arrhythmia.
